# Supplementary material for: Temporal proteomic analyses of human lung cells distinguish high pathogenicity influenza viruses and coronaviruses from low pathogenicity viruses
Source: Front Microbiol. 2022 Oct 10;13:994512. doi: 10.3389/fmicb.2022.994512 (PMC9589293; doi:10.3389/fmicb.2022.994512)
Supplement: Supplementary file 1 [file Data_Sheet_1.xlsx]

## Sheet: Supplementary Table S1
Supplementary Table S1. Protein-protein interaction networks affected by OC43 infection at 12, 24 and 48 hpi in MRC-5 cells.
		Top Diseases and Functions	Score1	# Significantly dysregulated proteins	Network Proteins2
	Network #
12 hpi3	1	Cardiovascular disease, Hematological disease, Metabolic disease	43	18	AKT,ALB,ALKBH5,AMPK,ATP2A3,BST1,caspase,DKK3,ERK1/2,EXT1,FRY, Hemoglobin,HMGCR,HMOX1,IL1,Immunoglobulin,Insulin,JPT1,LDL, MAP2K1/2,MAP4,MAPK,P38 MAPK,PDGF BB,PHLPP1,PI3K (complex), PKA,PKC(s),RAG1,RAS,SCD,SQLE,TBC1D8,TMUB1,VEGF
	2	Carbohydrate metabolism, Lipid metabolism, Small molecule biochemistry	25	11	AGTPBP1,ANKS1A,AR,ARFRP1,ARHGAP29,BCAS3,BSG,CASP8AP2, CCDC146,CGA,COX7C,DLG5,EGFR,FGFR1OP2,GSK3B,Histone H3, HTATSF1, IPO11,ITIH6,MIB2,NAA10,NFkB (complex),NLRP1, PNLIP,PNLIPRP2,RSAD1, RTTN,SMAD4,SUMO,TCEAL5, UBA2,UBC,VDAC1,ZNF135,ZNF227
24 hpi	1	Amino acid metabolism, Increased levels of albumin, molecular transport	30	13	ALB,CCR8,CD3,Chitosan oligosaccharide,CRB1,DEF6,DGKG, Glycosylphosphatidylinositol,IkB-NfkB1-RelA,IL1,IL10RB,Immunoglobulin, Insulin,JARID2,L-arginine,L-isoleucine,L-leucine,MAP4K3,Mcpt1, miR-148a-3p (and other miRNAs w/seed CAGUGCA),MPO,MX1,MYH3, NFkB (complex),NFkB-NFkBia,NFKBIB,P38 MAPK,SLA2, SQLE,Squalene,TCEAL7,TCR,THY1,USF1,WWTR1
	2	Cancer, Hematological disease, Immunological disease	27	11	AARS1,ABCD4,ACTR3B,ADGRV1,APOBEC3D,APP,Cd33,CHURC1, CREBBP,CTCF,CTNNB1,CYB5B,DPF3,FHAD1,HMGCS1,IFT22,KIF23, LARP1B,MYC,PCDHA11,PCDHA3,POGK,POLR3B,RBMXL1, RNF130,RNF24,ROBO3,SPEG, SRSF8,TCF3,TIGD4, TMEM41A,XPO1,ZNF2,ZSWIM8
48 hpi	1	Lipid metabolism, Molecular transport, Small molecule biochemistry	32	17	ACAC,ACLY,ACOX,AKR1C1/AKR1C2,AKR1B1(Aldose reductase), CYGB,ERK1/2,FADS2,FASN,G6PD,Glutathione peroxidase, GOT,Growth hormone,GSTM2,HBA1/HBA2,HDL,HDL-cholesterol, Histone H2b,LDL,LPIN1,N-COR,NFATC4,NQO1,NR1H,PGD,PI3K (family), PKG,PLIN2,SAR1A,SCD,SOD,SOD2,SREBP,T3-TR-RXR,TSH
	2	Cell death and survival, Humoral immune response, Inflammatory response	30	14	AKT,ALP,AP1,C1q,C1R,CD59,CG,Collagen(s),Collagenase,CREB,DDAH2, DYRK3,Fibrin,FOSL1,FSH,HIFif1,IL1,Lh,MDK,MSMO1,MVK,NOS,NOTCH, PDGF BB,PIK3IP1,PLAT,Pro-inflammatory Cytokine,PTX3,ROCK,SLC6A6, SMAD2/3,TGF beta,TKT,TMEM119,TXN
	3	Dermatological diseases and conditions, Inflammatory response, Organismal injury and abnormalities	27	14	ADRB,AKR1B1,AP2,ARL2BP,Caspase,CK2,Collagen,CTSK,CYP,CYP1B1, Cytochrome C,Estrogen receptor,HSP27,HSP70,IFI35,IFN Beta,Ige, Immunoglobulin,Interferon alpha,NAMPT,NCOA4,NFkB (complex), NMI,PARP,PARP9,RNA polymerase II,RPAP1,SQLE,STAT,TNF (family), TRIM38,TRIM5,Trypsin,Ubiquitin,UCHL1
	4	Metabolic disease, Organismal injury and abnormalities, Renal and urological disease	22	13	26s Proteasome,AGT,ALB,AMPK,ASS1,Calcineurin protein(s), CD3,Cytokine,GSK3,Hemoglobin,ICAM1,IgG,IL12 (complex),IL12 (family), JNK,KDM6A,KRT5,KRT9,MEK,MFAP4,MHC Class II (complex),MTORC1, NADPH oxidase,NFAT (complex),NFAT (family),p70 S6k,PDCD4, PI3K (complex),PIR,PKM,PLC gamma,PRKAA,Rb,TCR,TOP2A
	5	Gene expression, Post-translational modification, RNA damage and repair	20	13	2'-fucosyllactose,20s proteasome,Actin,ADCY,Androgen-AR,BLOC1S5, EEF1A,ERK,FABP3,GFAP,Histone H3,Histone H4,HSPB1,INCENP, Insulin,JINK1/2,LOC100360846/PSMB6,MAP2K1/2,MAPK,NEK10,P38 MAPK, PIF,PKC(s),PRDX6,Proinsulin,PSMB3,PSMD9,PTGR1,RAS,SQSTM1, Squalene,SRC (family),TAF6L,VEGF,ZFAT
	6	Cell cycle, Cellular movement, Reproductive system development and function	20	11	APEX2,APP,ARMC1,ARMC9,ATXN7L3,CD320,CEMIP,CNIH1,COL4A6, CRIP2, HRAS,IFT22,Keratan sulfate,KIAA0513,MAP3K1,NMNAT2, Plasminogen activator,PLK1,PXN,RFTN2,RNF24,ROBO3,SEPTIN6,SIRT1, SPEG,SUSD5,TGFB1,TIGD4,TM7SF2,TNFRSF10A,Trehalose,UBE2O, USP16,USP9Y,ZSWIM8
1 Network score generated by Ingenuity Pathway Analysis (IPA) default software settings
2 Proteins within indicated network. Significantly upregulated proteins identified by mass spectrometry in OC43-infected MRC-5 cells are indicated in red, whereas significantly downregulated proteins are indicated in green
3 hpi: hours post-infection

## Sheet: Supplementary Table S2
Supplementary Table S2. IPA-predicted MRC-5 diseases and functions significantly decreased or increased by OC43 infection at 48 hpi1
Predicted Activation State	Categories	Diseases or Functions Annotation	P-value	Activation Z-score2	# of Proteins	Proteins3
Decreased	Cancer, Hematological disease, Immunological disease, Organismal injury and abnormalities	Incidence of lymphoma	2.1e-05	-2.186	8	AURKA,IFNGR1,NQO1,PARP14, PDCD4,PRDX1,S100A4,SOD2
Decreased	Cardiovascular disease, Cell death and survival, Connective tissue disorders, Hematological disease, Organismal injury and abnormalities	Hemolytic anemia	0.000115	-2.213	6	ACSS2,CD59,G6PD,HBA1/HBA2, PRDX1,PRDX2
Decreased	Cardiovascular disease, Hematological disease, Organismal injury and abnormalities	Anemia	0.000173	-2.395	12	ACSS2,CD59,G6PD,GSTM3,HBA1/HBA2, NCOA4,NQO1,PRDX1,PRDX2,PTGS2, SOD2,TOP2A
Decreased	Cell death and survival	Cell death of cervical cancer cell lines	0.000101	-2.169	11	MAPK3,NCOA4,PARP16,PRDX2,SCD, SOD2,SPAG5,SQSTM1,TOP2A,TXN,UCHL1
Decreased	Cell death and survival,Organismal injury and abnormalities	Necrosis of epithelial tissue	5.36e-08	-2.488	20	ASS1,AURKA,FASN,GAPDH,HSPB1, HSPB8,IFNGR1,MAPK3,MVK,NAMPT, NRG1,PLA2G4A,PRDX1,PRDX2,PRDX6, PTGS2,SCD,SOD2,TGM2,TXN
Decreased	Connective tissue development and function, Hematological system development and function, Hematopoiesis, Organismal development, Tissue morphology	Quantity of reticulocytes	1.95e-05	-2.219	5	CD59,HBA1/HBA2,NQO1,PRDX1,PRDX2
Decreased	Connective tissue disorders, Hematological disease, Organismal injury and abnormalities	Poikilocytosis	1.33e-05	-2	4	CD59,HBA1/HBA2,PRDX1,PRDX2
Decreased	Free radical scavenging, Molecular transport	Quantity of reactive oxygen species	5.4e-07	-2.509	11	AKR1B1,AKR1B10,G6PD,NQO1,PGD, PRDX1,PRDX2,PRDX6,PTGS2,SOD2,TXN
Decreased	Hematological disease	Polycythemia	0.000605	-2.2	7	AURKA,CD59,HBA1/HBA2,PLA2G4A, PRDX1,PRDX2,PTGS2
Decreased	Hematological system development and function, Tissue morphology	Quantity of myeloid cells	0.000637	-2.382	13	AURKA,CD59,CD9,HBA1/HBA2,IFNGR1, LITAF,MAPK3,NQO1,PRDX1,PRDX2, PTGS2,TGM2,TXN
Decreased	Inflammatory response	Inflammation of body cavity	1.6e-06	-2.819	25	AKR1B10,CKB,FASN,FNTA,GAPDH, HBA1/HBA2,IFNGR1,LPIN1,NMI,NQO1, PLA2G4A,PRDX1,PRDX2,PRDX6,PTGS2, S100A4,SCD,SLC2A6,SOD2,SQSTM1, TGM2,TKT,TOP2A,TXN,UCHL1
Decreased	Inflammatory response, Organismal injury and abnormalities	Inflammation of organ	1.49e-12	-2.304	41	AKR1B10,ARRB1,CKB,DHCR7,EHD3, FADS2,FASN,FDPS,FNTA,GAPDH, HBA1/HBA2,HMGCS1,IFI35,IFNGR1, LAMA5,LPIN1,MAPK3,MKI67,MSMO1, MVD,MVK,NMI,NQO1,NRG1,PDCD4, PLA2G4A,PRDX1,PRDX2,PRDX6,PTGS2, S100A4,SCD,SLC2A6,SOD2,SQLE, SQSTM1,TGM2,TKT,TOP2A,TXN,UCHL1
Decreased	Neurological disease	Movement Disorders	7.79e-06	-2.185	26	ARF5,ARRB1,CKB,DHCR7,DTX3L,EIF4A2, FDPS,GAPDH,HSPB1,IFNGR1,ISOC1,NQO1, NRG1,PARP9,PRDX2,PRDX6,PTGS2,SCD, SOD2,SQSTM1,STAT2,STOM,TGM2,TXN, UCHL1,VPS35
Decreased	Organismal survival	Organismal death	0.000983	-3.975	35	ACLY,ARF5,ARRB1,ASS1,AURKA,BICC1, CD59,CKB,DHCR7,EHD3,FADS2,FASN, G6PD,HDAC7,HSPB1,HSPB8,IFNGR1, INCENP,MAPK3,MKI67,NAMPT,NQO1, PDCD4,PLIN2,PRDX1,PTGS2,S100A4, SCD,SOD2,SQSTM1,STAT2,TGM2, TKT,TOP2A,TXN
Increased	Cancer, Organismal injury and abnormalities	Growth of tumor	1.01e-06	2.65	25	ACLY,ACSL4,ACSS2,AKR1B1,AKR1B10, AURKA,CD59,FADS2,FASN,G6PD, GAPDH,IFNGR1,LITAF,MKI67,NAMPT, NCOA4,NRG1,PGD,PLA2G4A,PTGS2, SOD2,SQSTM1,TGM2,TXN,UCHL1
Increased	Carbohydrate metabolism	Metabolism of carbohydrate	0.000183	2.016	16	AKR1B1,AKR1B10,AKR1C1/AKR1C2, G6PD,GAPDH,LPIN1,NQO1,NRG1,PGD, PLA2G4A,PLIN2,PRDX2,PRDX6,SCD, SORD,TKT
Increased	Cell death and survival	Cell viability	4.7e-09	4.626	36	ACLY,ARRB1,ASS1,AURKA,CD59,CD9, FASN,FNTA,HBA1/HBA2,HMGCS1,HSPB1, HSPB8,LAMA5,MAPK3,MVK,MVP, NAMPT,NRG1,PARP14,PDCD4,PLA2G4A, PLIN2,PRDX2,PRDX6,PSMB3,PTGR1, PTGS2,S100A4,SCD,SOD2,SQLE, SQSTM1,TGM2,TOP2A,TXN,UCHL1
Increased	Cell death and survival	Cell viability of tumor cell lines	0.000184	2.683	20	ARRB1,AURKA,FASN,HBA1/HBA2, HSPB1,HSPB8,NAMPT,NRG1,PARP14, PDCD4,PRDX2,PSMB3,PTGS2,S100A4, SCD,SOD2,SQSTM1,TGM2,TOP2A,TXN
Increased	Cell signaling, Small molecule biochemistry	Synthesis of nitric oxide	3.94e-05	2.209	10	ASS1,DDAH2,FASN,G6PD,IFNGR1, MAPK3,NQO1,PRDX1,PTGS2,SOD2
Increased	Cellular development, Cellular growth and proliferation	Cell proliferation of tumor cell lines	1.99e-12	3.575	47	AAGAB,ACLY,ACSL4,AKR1B10, ANKHD1/ANKHD1-EIF4EBP3,ARL2BP, ARRB1,ASS1,AURKA,CD59,DDX21,FADS2, FASN,FDPS,FNTA,G6PD,GAPDH, HMGCS1,HSPB1,HSPB8,IGBP1,LAMA5, MAPK3,MKI67,MSMO1,NAMPT,NCOA4, NQO1,NRG1,PARP16,PDCD4,PGD, PLA2G4A,PRDX2,PSMB3,PTGS2,S100A4, SAR1A,SCD,SOD2,SQSTM1,STAT2,TGM2, TNS3,TXN,UCHL1,VPS35
Increased	Cellular development, Cellular growth and proliferation	Cell proliferation of breast cancer cell lines	0.000281	2.36	13	ACSL4,AURKA,CD59,FASN,HSPB8, NQO1,NRG1,PRDX2,S100A4,SOD2, TGM2,TNS3,TXN
Increased	Cellular development, Cellular growth and proliferation	Proliferation of leukemia cell lines	0.000664	2.137	8	FASN,HMGCS1,IGBP1,MSMO1,PTGS2, SAR1A,SQSTM1,TXN
Increased	Cellular function and maintenance	Cellular homeostasis	9.54e-07	2.081	34	ACLY,ACSL1,AKR1B1,ARRB1,AURKA, CKB,G6PD,GAPDH,HS1BP3,HSPB1,HSPB8, IFNGR1,LPIN1,MAPK3,NAMPT,NCOA4, NQO1,NRG1,PLA2G4A,PRDX1,PRDX2, PTGS2,S100A4,SCD,SOD2,SQSTM1,STAT2, TBC1D17,TGM2,TRIM5,UBE2O,UCHL1, VPS35,ZFYVE1
Increased	Cellular movement	Cell movement of cervical cancer cell lines	0.000142	2.219	6	ARRB1,MYO10,PTGS2,TGM2,TXN,UCHL1
Increased	Cellular movement	Cell movement	0.000334	2.061	36	ACSL4,AKR1B1,ARRB1,AURKA,CD59, CD9,FASN,G6PD,GAPDH,HSPB1,IFNGR1, IGBP1,LAMA5,LITAF,MAPK3,MYO10, NAMPT,NQO1,NRG1,PARP9,PDCD4, PLA2G4A,PRDX1,PRDX2,PRDX6,PTGS2, S100A4,SOD2,SORD,SQSTM1,STAT2, TGM2,TKT,TNS3,TXN,UCHL1
Increased	Drug metabolism, Lipid metabolism, Small molecule biochemistry	Synthesis of prostaglandin E2	3.04e-06	2.559	8	ACSL4,AKR1B1,FASN,G6PD,MAPK3, NRG1,PLA2G4A,PTGS2
Increased	Energy production, Molecular transport, Nucleic acid metabolism, Small molecule biochemistry	Concentration of ATP	8.84e-05	2	7	ACLY,ACSS2,GAPDH,NAMPT,NQO1, SOD2,SQSTM1
Increased	Free radical scavenging	Modification of reactive oxygen species	3.73e-10	2.296	6	NQO1,PRDX1,PRDX2,PTGS2,SOD2,TXN
Increased	Gene expression	Expression of RNA	2.26e-05	2.192	36	ARRB1,AURKA,CALCOCO1,CD9,DDX21, DTX3L,EIF4A2,GAPDH,HDAC7,HSPB1, IFNGR1,IGBP1,LITAF,LPIN1,MAPK3, MVK,NAMPT,NCOA4,NMI,NQO1,NRG1, PARP14,PARP9,PBXIP1,PDCD4,PIR, PSMD9,SOD2,SQSTM1,STAT2,TGM2, TOP2A,TRIM16,TXN,USP16,VPS35
Increased	Gene expression	Transcription	0.00102	2.254	30	ARRB1,AURKA,CALCOCO1,CD9,DDX21, DTX3L,HDAC7,IFNGR1,IGBP1,LITAF, LPIN1,MAPK3,NAMPT,NCOA4,NMI, NRG1,PARP14,PARP9,PBXIP1,PDCD4, PIR,PSMD9,SOD2,SQSTM1,STAT2, TOP2A,TRIM16,TXN,USP16,VPS35
Increased	Hematological system development and function	Hematocrit	5.65e-06	2.433	7	CD59,G6PD,PRDX1,PRDX2, PTGS2,SOD2,TGM2
Increased	Infectious diseases	Infection by RNA virus	2.86e-07	2.008	27	ACSL1,ARRB1,CALCOCO1,CD9,COG3,COG4, FADS1,FDPS,FNTA,GAPDH,HBA1/HBA2, HMGCS1,IFI35,IFNGR1,NAMPT,NMI,NQO1, NRG1,PARP14,PARP9,PLA2G4A,PTGS2, S100A4,STAT2,TNFAIP2,TOP2A,TRIM5
Increased	Inflammatory response	Inflammatory response	9.5e-05	2.605	18	CD9,HDAC7,HSPB1,IFI35,LITAF,MAPK3, MVK,NMI,NRG1,PDCD4,PLA2G4A,PLIN2, PRDX6,PTGS2,S100A4,TGM2,TXN,VPS35
Increased	Lipid metabolism, Molecular transport, Small molecule biochemistry	Concentration of fatty acid	1.16e-08	2.635	15	ACLY,ACSL1,ACSL4,ACSS2,AKR1B1, AKR1B10,FADS2,FASN,G6PD,LPIN1, PLA2G4A,PLIN2,PRDX6,PTGS2,SCD
Increased	Lipid metabolism, Molecular transport, Small molecule biochemistry	Accumulation of lipid	2.94e-05	2.746	11	ACAT2,ACLY,ACSL1,FASN,HDAC7, LPIN1,NRG1,PLA2G4A,PLIN2,PRDX6,SCD
Increased	Lipid metabolism, Molecular transport, Small molecule biochemistry	Release of lipid	6.44e-05	2.036	8	FASN,G6PD,LPIN1,MAPK3,NAMPT,NRG1, PLA2G4A,PTGS2
Increased	Lipid metabolism, Molecular transport, Small molecule biochemistry	Conversion of acyl-coenzyme A	4.38e-08	2.213	5	ACLY,ACSL1,ACSL4,ACSS2,FASN
Increased	Lipid metabolism, Small molecule biochemistry	Synthesis of lipid	3.07e-13	3.582	31	ACAT2,ACLY,ACSL1,ACSL4,ACSS2, AKR1B1,AKR1C1/AKR1C2,CD9,DHCR7, FADS1,FADS2,FASN,FDPS,G6PD,HMGCS1, LPIN1,MAPK3,MSMO1,MVD,MVK,NRG1, PGD,PLA2G4A,PLIN2,PRDX2,PTGS2, SAR1A,SCD,SLC6A6,SQLE,TXN
Increased	Lipid metabolism, Small molecule biochemistry	Fatty acid metabolism	4.13e-12	3.53	25	ACLY,ACSL1,ACSL4,ACSS2,AKR1B1, AKR1C1/AKR1C2,CD9,FADS1,FADS2,FASN, G6PD,LPIN1,MAPK3,MSMO1,NQO1, NRG1,PLA2G4A,PLIN2,PRDX6,PTGR1, PTGS2,SAR1A,SCD,SLC6A6,TXN
Increased	Lipid metabolism, Small molecule biochemistry	Synthesis of fatty acid	2.09e-09	3.496	16	ACLY,ACSL1,ACSL4,ACSS2,AKR1B1, FADS1,FADS2,FASN,G6PD,MAPK3,NRG1, PLA2G4A,PTGS2,SAR1A,SCD,TXN
Increased	Lipid metabolism, Small molecule biochemistry	Incorporation of lipid	2.69e-09	2.505	7	ACLY,ACSL1,ACSL4,FASN, PLA2G4A,PLIN2,SCD
Increased	Lipid metabolism, Small molecule biochemistry	Incorporation of fatty acid	1.18e-08	2.328	6	ACLY,ACSL1,ACSL4,PLA2G4A,PLIN2,SCD
Increased	Lipid metabolism, Small molecule biochemistry	Conversion of fatty acid	1.91e-08	2.577	7	ACLY,ACSL1,ACSL4,ACSS2,FADS1, FASN,PTGS2
Increased	Lipid metabolism, Small molecule biochemistry	Metabolism of polyunsaturated fatty acids	5.09e-08	3.042	13	ACSL1,ACSL4,AKR1B1,AKR1C1/AKR1C2, FADS1,FADS2,FASN,G6PD,MAPK3,NRG1, PLA2G4A,PTGR1,PTGS2
Increased	Lipid metabolism, Small molecule biochemistry	Metabolism of eicosanoid	3.19e-07	3.042	12	ACSL4,AKR1B1,AKR1C1/AKR1C2,FADS1, FADS2,FASN,G6PD,MAPK3,NRG1, PLA2G4A,PTGR1,PTGS2
Increased	Lipid metabolism, Small molecule biochemistry	Biosynthesis of polyunsaturated fatty acids	6.31e-07	3.046	11	ACSL4,AKR1B1,FADS1,FADS2,FASN, G6PD,MAPK3,NRG1,PLA2G4A, PTGS2,SCD
Increased	Lipid metabolism, Small molecule biochemistry	Metabolism of prostaglandin	6.45e-07	2.72	10	ACSL4,AKR1B1,AKR1C1/AKR1C2, FASN,G6PD,MAPK3,NRG1,PLA2G4A, PTGR1,PTGS2
Increased	Lipid metabolism, Small molecule biochemistry	Synthesis of eicosanoid	4.35e-06	3.043	10	ACSL4,AKR1B1,FADS1,FADS2,FASN, G6PD,MAPK3,NRG1,PLA2G4A,PTGS2
1 Table entries sorted first by activation state, then by category, then by p-value
2 Z-score expressed as s, with those ≤ -1.96, indicated in green, and those ≥ 1.96, indicated in red, considered significant
3 Proteins within indicated category. All listed proteins were dysregulated ≥ ±1.25-fold; those in red and green were dysregulated ≥ 1.33-fold up or down, respectively
